# Supplementary material for: Can graphene improve the thermal conductivity of copper nanofluids?
Source: Royal Society of Chemistry journal article supplement (doi:10.1039/d3cp00064h), 2023-01-01
Supplement: d3cp00064h2.pdf [file d3cp00064h2.pdf]

## Supporting Information

# Can graphene improve the thermal conductivity of copper nanofluids?

Gabriel J. Olguin-Orellana,<sup>\*a</sup> Germán J. Soldano,<sup>b</sup> J. Alzate-Morales,<sup>a</sup> María B. Camarada<sup>\*cd</sup> and Marcelo M. Mariscal<sup>\*b</sup>

<sup>a</sup> Center for Bioinformatics, Simulation and Modeling (CBSM), Faculty of Engineering, Universidad de Talca, 1 Poniente 1141, Talca, Chile. *E-mail:* [gabriel.olguin@utalca.cl](mailto:gabriel.olguin@utalca.cl)

<sup>b</sup> INFIQC, CONICET, Departamento de Química Teórica y Computacional, Facultad de Ciencias Químicas, Universidad Nacional de Córdoba, Argentina. *E-mail:* [marcelo.mariscal@unc.edu.ar](mailto:marcelo.mariscal@unc.edu.ar)

<sup>c</sup> Laboratorio de Materiales Funcionales, Departamento de Química Inorgánica, Facultad de Química y de Farmacia, Pontificia Universidad Católica de Chile.

<sup>d</sup> Centro Investigación en Nanotecnología y Materiales Avanzados, CIEN-UC, Pontificia Universidad Católica de Chile, Santiago, Chile.

DOI: 10.1039/x0xx00000x

E-mail: [mbcamara@uc.cl](mailto:mbcamara@uc.cl) / [marcelo.mariscal@unc.edu.ar](mailto:marcelo.mariscal@unc.edu.ar)

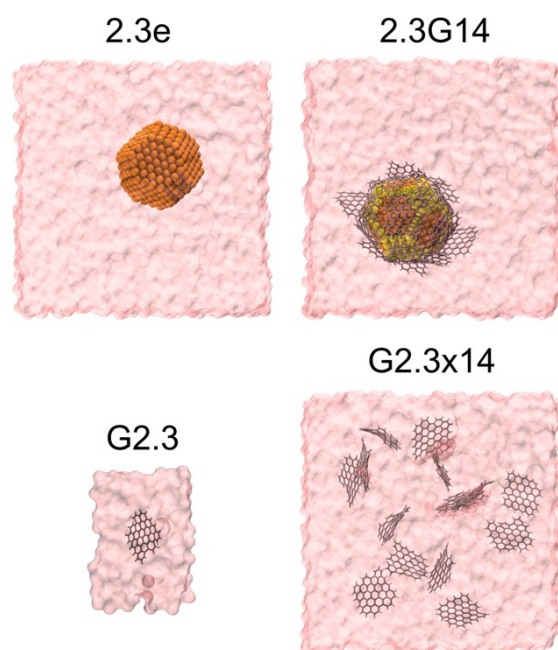

**Figure S1** Simulation models to evaluate the contribution of each nanomaterial to the thermal conductivity of the Cu-Ar and Cu capped by graphene (Cu@G)-Ar nanofluids.

**Table S1** Summary of the dimensions of the studied systems and their atomic composition.

| Model             | Box side length (Å) | Cu atoms | C atoms | H atoms | Ar atoms |
|-------------------|---------------------|----------|---------|---------|----------|
| 15                | 55.3×52.5×46.8      | 201      | -       | -       | 3343     |
| 23                | 62.9×58.8×62.08     | 586      | -       | -       | 4720     |
| 31                | 70.6×65.1×68.5      | 1289     | -       | -       | 6357     |
| 40                | 78.3×71.4×76.9      | 2406     | -       | -       | 8255     |
| 6.1               | 101.1×90.2×69.7     | 9201     | -       | -       | 15443    |
| 15G14             | 72.0×66.2×62.1      | 201      | 420     | 196     | 5954     |
| 23G14             | 71.6×74.6×72.22     | 586      | 812     | 280     | 7440     |
| 31G14             | 84.0×79.7×84.9      | 1289     | 1540    | 392     | 10451    |
| 40G14             | 90.1×85.0×96.4      | 2406     | 2212    | 476     | 13132    |
| 6.1G14            | 109.2×107.1×115.3   | 9201     | 5068    | 728     | 21366    |
| 23G2              | 73.1×75.6×73.8      | 586      | 828     | 112     | 7440     |
| 23G36             | 74.6×77.0×75.6      | 586      | 792     | 430     | 7440     |
| 23G14b            | 81.8×80.0×76.72     | 586      | 1624    | 560     | 9348     |
| 23G14t            | 88.1×82.3×88.1      | 586      | 2436    | 840     | 11251    |
| 23G14tp           | 92.3×91.3×90.6      | 586      | 2436    | 840     | 11227    |
| 23x15             | 106.7×95.8×104.1    | 8790     | -       | -       | 15443    |
| 23G14x15          | 113.4×105.8×119.3   | 8790     | 12180   | 4200    | 21366    |
| graphene          | 51.2×50.3×43.9      | -        | 1008    | -       | 2049     |
| bilayer graphene  | 51.1×50.1×45.9      | -        | 2016    | -       | 2047     |
| trilayer graphene | 49.6×50.6×46.7      | -        | 3024    | -       | 1946     |

**Table S2** Lennard-Jones parameters for the interactions between the atoms of the NPs and the Ar fluid. The Cu-Ar parameters were reported by Lv *et al.*<sup>1</sup> while the C-Ar, H-Ar and Ar-Ar by Fraenkel *et al.*<sup>2</sup>

|         | $\epsilon$ (eV) | $\sigma$ (Å) |
|---------|-----------------|--------------|
| Cu — Ar | 0.0650071       | 2.872        |
| C — Ar  | 0.0043400       | 3.480        |
| H — Ar  | 0.0040900       | 3.208        |
| Ar — Ar | 0.0103400       | 3.400        |

**Table S3** Thermal conductivity ( $\kappa$ ) of liquid Ar as a function of the simulation time and size of the simulation box at T=86 K and  $\rho=1418$  km/m<sup>3</sup>. When the simulation time varies, the box side length was set to 40×40×40 Å<sup>3</sup>. When the box size varies, the simulation time remains constant at 1 ns.

| Simulation time (ns) | $\kappa$ (Wm <sup>-1</sup> K <sup>-1</sup> ) | Box side length (Å) | $\kappa$ (Wm <sup>-1</sup> K <sup>-1</sup> ) |
|----------------------|----------------------------------------------|---------------------|----------------------------------------------|
| 0.25                 | 0.1318                                       | 30×30×30            | 0.1292                                       |
| 0.50                 | 0.1270                                       | 40×40×40            | 0.1105                                       |
| 0.75                 | 0.1278                                       | 50×50×50            | 0.1322                                       |
| 1.00                 | 0.1311                                       | 60×60×60            | 0.1239                                       |

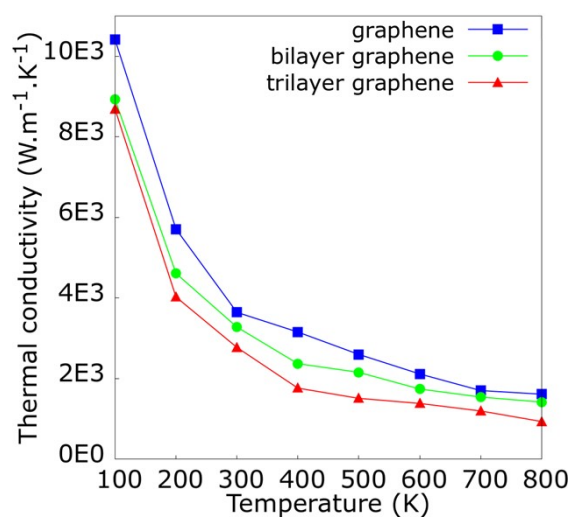

**Figure S2** Estimation of thermal conductivity for mono-, bi-, and trilayer infinite graphene, evaluated from 100 to 800 K.

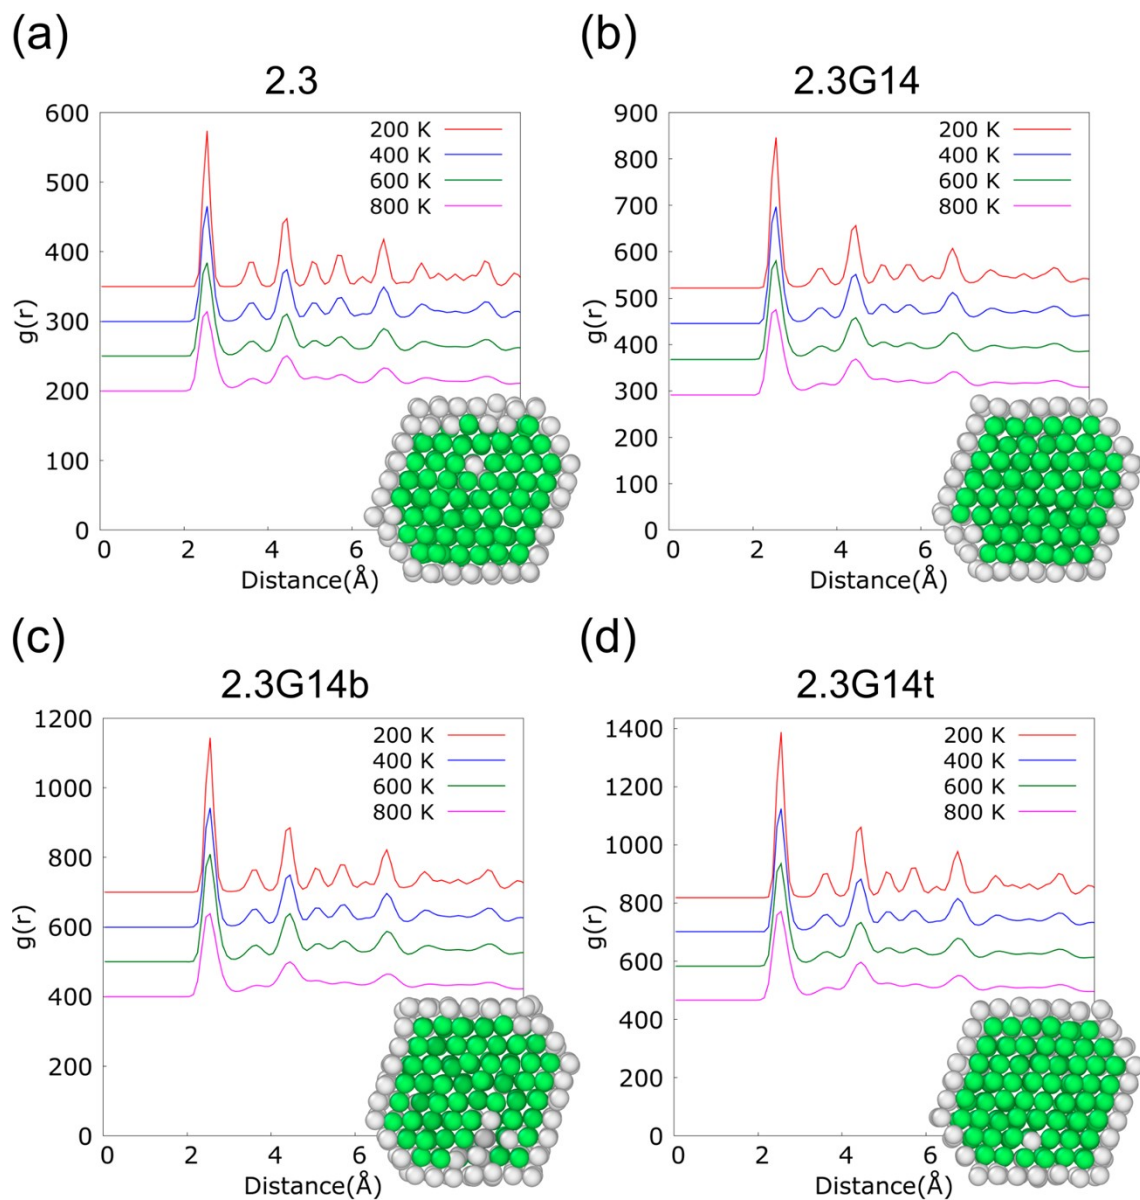

**Figure S3** Average Radial Distribution Function ( $g(r)$ ) and Common Neighbor Analysis (CNA) for the 2.3, 2.3G14, 2.3G14b and 2.3G14t nanofluids during 1 ns of simulation. The green atoms in the CNA represent those that are part of the FCC crystalline structure of the nanoparticle at a given instant at 800 K.

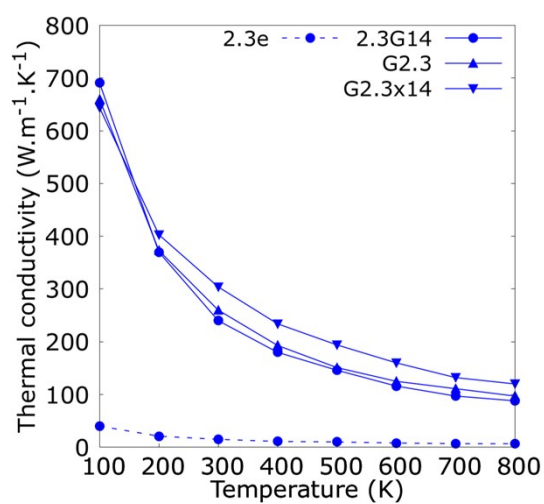

**Figure S4** Contribution of each nanomaterial (structured shown in Fig. S1) of the Cu@G NPs in the estimation of thermal conductivity for the nanofluids, and evaluated from 100 to 800 K.

## References

- 1 J. Lv, M. Bai, W. Cui and X. Li, *Nanoscale Res. Lett.*, 2011, **6**, 200.
- 2 R. Fraenkel, D. Schweke, Y. Haas, F. Molnár, D. Horinek and B. Dick, *J. Phys. Chem. A*, 2000, **104**, 3786–3791.
